# Supplementary material
Source: PubMed Central journal article supplement (PMC6536136)
Supplement: es8b04392_si_001.pdf [file es8b04392_si_001.pdf]

# SUPPORTING INFORMATION FOR THE PAPER: FUNGICIDES – AN OVERLOOKED PESTICIDE CLASS?

*Jochen P. Zubrod<sup>\*,†,‡</sup>, Mirco Bundschuh<sup>†,§</sup>, Gertie Arts<sup>||</sup>, Carsten A. Brühl<sup>†</sup>, Gwenaël Imfeld<sup>⊥</sup>,  
Anja Knäbel<sup>†</sup>, Sylvain Payraudeau<sup>⊥</sup>, Jes J. Rasmussen<sup>#</sup>, Jason Rohr<sup>∇,Δ</sup>, Andreas Scharmüller<sup>†</sup>,  
Kelly Smalling<sup>°</sup>, Sebastian Stehle<sup>†,‡</sup>, Ralf Schulz<sup>†,‡</sup>, Ralf B. Schäfer<sup>†</sup>*

<sup>†</sup>Institute for Environmental Sciences, University of Koblenz-Landau, Fortstraße 7, D-76829 Landau, Germany

<sup>‡</sup>Eußerthal Ecosystem Research Station, University of Koblenz-Landau, Birkenthalstraße 13, D-76857 Eußerthal, Germany

<sup>§</sup>Department of Aquatic Sciences and Assessment, Swedish University of Agricultural Sciences, Lennart Hjelm's väg 9, SWE-75007 Uppsala, Sweden

<sup>||</sup> Wageningen Environmental Research, Wageningen University and Research, Wageningen, The Netherlands

<sup>⊥</sup>Laboratoire d'Hydrologie et de Géochimie de Strasbourg (LHyGeS), Université de Strasbourg/ENGEES, CNRS, 1 rue Blessig, 67084 Strasbourg Cedex, France

<sup>#</sup>Aarhus University, Dept. of Bioscience, Vejlsovej 25, 8600 Silkeborg, Denmark

<sup>∇</sup>University of South Florida, Department of Integrative Biology, Tampa, FL, USA

<sup>Δ</sup>Department of Biological Sciences, Environmental Change Initiative, and Eck Institute for Global Health, University of Notre Dame, Notre Dame, IN, USA

<sup>°</sup>US Geological Survey, New Jersey Water Science Center, Lawrenceville, New Jersey, USA

**This file contains 4 tables**

## DETAILS ABOUT LITERATURE REVIEW

The literature search was performed in mid-2017. Note that references of all retrieved articles (including topically related reviews; e.g., Maltby et al.<sup>1</sup>) were screened for further relevant articles.

### **Exposure part.**

- Physico-chemical Properties: Pesticide Properties DataBase<sup>2</sup> was searched for parameters related to mobility and dissipation for fungicides, herbicides, and insecticides as well as for the major fungicide groups.
- Detection in Aquatic Systems: First, all fungicide concentrations were extracted from the field studies (n = 56) reported by Knäbel et al.,<sup>3</sup> a comprehensive compilation of fungicide surface water concentrations until 2012. Second, Web of Science was searched using the search string “(fungicid\* AND (exposure\* OR concentration\*) AND (water OR lake OR stream OR river OR aquatic) AND (“field stud\*” or monitor\*))” in order to retrieve studies with fungicide surface water concentrations for the time span 2012 – 2017. Studies were considered irrelevant if they dealt with inorganic fungicides, long phased out fungicides, or when individual fungicide data was unavailable or not reported. Fungicide classes with less than 10 observations were excluded from Table 1 and Table S1 (1090 observations).

### **Mitigation part.**

- Web of Science was searched using the search string “(pesticid\* OR fungicid\*) AND (mitigat\* OR buffer\* OR wetland\*) AND (aqua\* OR ditch\* OR freshwat\* OR pond\*)”.

### **Effects part.**

- Microorganisms: Web of Science was searched using the search string “fungicid\* AND (effect OR ecotox\* OR toxic\*) AND (water OR lake OR stream OR river OR aquatic) AND (fungi OR fungus OR fungal OR microorganism OR microb\* OR bacteri\* OR diatom OR algae)”.
- Plants: Web of Science was searched using the strings “fungicid\* AND effect AND macrophyte\*”, “fungicid\* AND effect AND (plant\* OR macrophyte\*)”, and “fungicid\* AND (effect OR ecotox\* OR testing)”. Additionally, Web of Science was searched on the compound level, e.g. “azoxystrobin AND (plant\* OR macrophyte\*)”.
- Invertebrates: Web of Science was searched using the search string “fungicid\* AND (water OR lake OR stream OR river OR aquatic OR marin\*) AND (invertebrate OR crustacean OR insect OR snail OR worm OR larva\* OR bivalv\*)”.
- Vertebrates: Web of Science was searched using the string “fungicid\* AND (water OR lake OR stream OR river OR aquatic OR marin\*) AND (fish\* OR reptile\* OR turtle\* OR

alligator\* OR crocodil\* OR amphibian\* OR frog\* OR salamander\* OR mammal\*)”.

- Effect studies were considered irrelevant if they dealt with inorganic fungicides, long phased-out fungicides, fungicides were applied only in mixture with other chemical pollutants, or when field assessments were not designed to primarily detect fungicide effects.

**Risk part.**

- Pesticide Properties DataBase<sup>2</sup> was searched for acute toxicity data for algae, fish, and invertebrates for the 28 fungicides for which  $\geq 10$  observations were available.

## FUNGICIDE DETECTION IN SURFACE WATERS

**Table S1.** Fungicide concentrations detected in surface waters by continent (N = number of observations on each continent).\*

| Substance         | Fungicide group         | Continent              | Mean (SD)     | Median | Range       | References                                                                                                                                                                                                                                                                                                                                                                                                                                      |
|-------------------|-------------------------|------------------------|---------------|--------|-------------|-------------------------------------------------------------------------------------------------------------------------------------------------------------------------------------------------------------------------------------------------------------------------------------------------------------------------------------------------------------------------------------------------------------------------------------------------|
| Azoxystrobin      | Strobilurin             | Europe (N=29)          | 2.59 (6.61)   | 0.400  | 0.033-29.7  | Berenzen et al. 2005 <sup>4</sup> , Bereswill et al. 2012 <sup>5</sup> , Liess et al. 2005 <sup>6</sup> , Magali et al. 2016 <sup>7</sup> , Maillard et al. 2012 <sup>8</sup> , Neumann et al. 2003 <sup>9</sup> , Rabiet et al. 2010 <sup>10</sup>                                                                                                                                                                                             |
|                   |                         | North America (N = 98) | 0.116 (0.488) | 0.024  | 0.0005-4.55 | Battaglin et al. 2011 <sup>11</sup> , Reilly et al. 2012 <sup>12</sup> , Smalling and Orlando 2011 <sup>13</sup> , Smalling et al., 2015 <sup>14</sup>                                                                                                                                                                                                                                                                                          |
|                   |                         | South America (N=1)    | 1.360         | NA     | NA          | Milhome et al. 2015 <sup>15</sup>                                                                                                                                                                                                                                                                                                                                                                                                               |
| Benomyl           | Benzimidazole           | North America (N=1)    | 0.011         | NA     | NA          | Phillips and Bode 2004 <sup>16</sup>                                                                                                                                                                                                                                                                                                                                                                                                            |
| Boscalid          | Carboxamide             | Europe (N=4)           | 7.29 (9.72)   | 2.55   | 0.049-24.0  | Bereswill et al. 2012 <sup>5</sup> , Papadakis et al. 2015 <sup>17</sup>                                                                                                                                                                                                                                                                                                                                                                        |
|                   |                         | North America (N=101)  | 0.534 (3.62)  | 0.028  | 0.0028-36.0 | Reilly et al. 2012 <sup>12</sup> , Smalling and Orlando 2011 <sup>13</sup>                                                                                                                                                                                                                                                                                                                                                                      |
| Captfol           | Caboxamide              | Europe (N=1)           | 0.0106        | NA     | NA          | Vioque-Fernández et al. 2007 <sup>18</sup>                                                                                                                                                                                                                                                                                                                                                                                                      |
| Captan            | Phthalimide             | Africa (N=6)           | 0.026 (0.014) | 0.030  | 0.012-0.037 | Abbassy et al. 1999 <sup>19</sup>                                                                                                                                                                                                                                                                                                                                                                                                               |
|                   |                         | Asia (N=6)             | 0.161 (0.169) | 0.087  | 0.014-0.380 | Oh et al. 2007 <sup>20</sup>                                                                                                                                                                                                                                                                                                                                                                                                                    |
|                   |                         | Europe (N=3)           | 0.317 (0.309) | 0.260  | 0.040-0.650 | Angelidis et al. 1996 <sup>21</sup> , Jimenez et al 1997 <sup>22</sup>                                                                                                                                                                                                                                                                                                                                                                          |
|                   |                         | North America (N=1)    | 0.218         | NA     | NA          | Smalling et al., 2015 <sup>14</sup>                                                                                                                                                                                                                                                                                                                                                                                                             |
| Carbendazim       | Benzimidazole           | Africa (N=4)           | 1.48 (1.02)   | 1.40   | 0.600-2.50  | Stehle et al. 2016 <sup>23</sup>                                                                                                                                                                                                                                                                                                                                                                                                                |
|                   |                         | Europe (N=19)          | 0.652 (1.48)  | 0.160  | 0.025-6.50  | Rabiet et al. 2010 <sup>10</sup> , Readman et al. 1997 <sup>24</sup> , Sancho et al. 2004 <sup>25</sup> , Süß et al. 2006 <sup>26</sup>                                                                                                                                                                                                                                                                                                         |
|                   |                         | South America (N=8)    | 1.36 (1.38)   | 1.10   | 0.200-4.50  | Palma et al. 2004 <sup>27</sup>                                                                                                                                                                                                                                                                                                                                                                                                                 |
| Chlorothalonil    | Chloronitrile           | Asia (N=3)             | 0.367 (0.289) | 0.200  | 0.200-0.700 | Sangchan et al. 2014 <sup>28</sup>                                                                                                                                                                                                                                                                                                                                                                                                              |
|                   |                         | Europe (N=5)           | 0.039 (0.018) | 0.034  | 0.022-0.070 | Lambropoulou et al. 2000 <sup>29</sup>                                                                                                                                                                                                                                                                                                                                                                                                          |
|                   |                         | North America (N=64)   | 0.046 (0.143) | 0.0026 | <0.005-1.00 | Arnold et al. 2004 <sup>30</sup> , Battaglin et al. 2011 <sup>11</sup> , Castillo et al. 2000 <sup>31</sup> , Diepens et al. 2014 <sup>32</sup> , Lehotay et al. 1998 <sup>33</sup> , LeNoir et al. 1999 <sup>34</sup> , Reilly et al. 2012 <sup>12</sup> , Scott et al. 2002 <sup>35</sup> , Smalling and Orlando 2011 <sup>13</sup> , Smalling et al., 2015 <sup>14</sup> , Tierney et al. 2008 <sup>36</sup> , Wan et al. 2006 <sup>37</sup> |
| Cyproconazole     | Triazole                | Europe (N=1)           | 0.040         | NA     | NA          | Magali et al. 2016 <sup>7</sup>                                                                                                                                                                                                                                                                                                                                                                                                                 |
| Cyprodinil        | Anilinopyrimidine       | Europe (N=11)          | 0.865 (0.803) | 0.740  | 0.020-2.40  | Bereswill et al. 2012 <sup>5</sup> , Süß et al. 2006 <sup>26</sup>                                                                                                                                                                                                                                                                                                                                                                              |
|                   |                         | North America (N=4)    | 0.047 (0.088) | 0.004  | 0.001-0.176 | Reilly et al. 2012 <sup>12</sup>                                                                                                                                                                                                                                                                                                                                                                                                                |
| Dichloran         | Chlorophenyl            | Europe (N=1)           | 0.474         | NA     | NA          | Readman et al. 1997 <sup>24</sup>                                                                                                                                                                                                                                                                                                                                                                                                               |
| Difenoconazole    | Triazole                | North America (N=2)    | 0.55 (0.25)   | 0.55   | 0.25-0.80   | Diepens et al. 2014 <sup>32</sup>                                                                                                                                                                                                                                                                                                                                                                                                               |
|                   |                         | South America (N=1)    | 6.93          | NA     | NA          | Milhome et al. 2015 <sup>15</sup>                                                                                                                                                                                                                                                                                                                                                                                                               |
| Dimethomorph      | Morpholine              | Africa (N=1)           | 0.200         | NA     | NA          | Stehle et al. 2016 <sup>23</sup>                                                                                                                                                                                                                                                                                                                                                                                                                |
|                   |                         | Europe (N=15)          | 5.92 (9.05)   | 2.81   | 0.029-35.0  | Bereswill et al. 2012 <sup>5</sup> , Lefrancq et al. 2017 <sup>38</sup> , Maillard et al. 2012 <sup>8</sup> , Papadakis et al. 2015 <sup>17</sup> , Rabiet et al. 2010 <sup>10</sup>                                                                                                                                                                                                                                                            |
| Edifenphos        | Organophosphate         | Asia (N=16)            | 0.216 (0.458) | 0.0205 | 0.005-1.52  | Nagafuchi et al. 1994 <sup>39</sup> , Numabe and Nagahora 2006 <sup>40</sup> , Sudo et al. 2004 <sup>41</sup> , Tanabe et al. 2001 <sup>42</sup> , Tsuda et al. 1996 <sup>43</sup>                                                                                                                                                                                                                                                              |
| Epoconazole       | Triazole                | Europe (N=15)          | 0.896 (1.56)  | 0.100  | 0.050-5.60  | Berenzen et al. 2005 <sup>4</sup> , Liess et al. 2005 <sup>6</sup> , Magali et al. 2016 <sup>7</sup> , Neumann et al. 2002 <sup>44</sup>                                                                                                                                                                                                                                                                                                        |
|                   |                         | North America (N=6)    | 0.333 (0.216) | 0.250  | 0.100-0.600 | Diepens et al. 2014 <sup>32</sup>                                                                                                                                                                                                                                                                                                                                                                                                               |
|                   |                         | South America (N=2)    | 0.038 (0.018) | 0.038  | 0.025-0.050 | De Gerónimo et al. 2014 <sup>45</sup>                                                                                                                                                                                                                                                                                                                                                                                                           |
| Fenpropimorph     | Morpholine              | Europe (N=10)          | 2.71 (3.79)   | 1.13   | 0.20-12.0   | Kreuger 1998 <sup>46</sup> , Liess et al. 2005 <sup>6</sup> , Ludvigsen and Lode 2001 <sup>47</sup> , Neumann et al. 2002 <sup>44</sup> , Neumann et al. 2003 <sup>9</sup> , Turnbull et al. 1997 <sup>48</sup>                                                                                                                                                                                                                                 |
| Fluopicolide      | Benzamide               | Europe (N=1)           | 8.2           | NA     | NA          | Lefrancq et al. 2017 <sup>38</sup>                                                                                                                                                                                                                                                                                                                                                                                                              |
| Fluquinconazole   | Triazole                | Europe (N=8)           | 2.11 (2.21)   | 0.925  | 0.07-5.60   | Süß et al. 2006 <sup>26</sup>                                                                                                                                                                                                                                                                                                                                                                                                                   |
| Flusilazole       | Triazole                | Africa (N=4)           | 0.650 (0.554) | 0.40   | 0.20-1.60   | Stehle et al. 2016 <sup>23</sup>                                                                                                                                                                                                                                                                                                                                                                                                                |
|                   |                         | Europe (N=1)           | 0.042         | NA     | NA          | Magali et al. 2016 <sup>7</sup>                                                                                                                                                                                                                                                                                                                                                                                                                 |
| Flutolanil        | Oxathiin                | Asia (N=35)            | 2.32 (5.63)   | 0.200  | 0.009-30.3  | Añasco et al. 2010 <sup>49</sup> , Nagafuchi et al. 1994 <sup>39</sup> , Oh et al. 2007 <sup>20</sup> , Okamura et al. 1999 <sup>50</sup> , Sudo et al. 2004 <sup>41</sup> , Tanabe and Kawata 2009 <sup>51</sup> , Tanabe et al. 2000 <sup>52</sup> , Tanabe et al. 2001 <sup>42</sup> , Tsuda et al. 1996 <sup>43</sup>                                                                                                                       |
| Flutriafol        | Oxathiin                | Europe (N=3)           | 0.034 (0.018) | 0.044  | 0.009-0.05  | Long et al. 1998 <sup>53</sup> , Papadakis et al. 2015 <sup>17</sup>                                                                                                                                                                                                                                                                                                                                                                            |
| Folpet            | Phthalimide             | Europe (N=6)           | 0.640 (0.853) | 0.157  | 0.011-2.3   | Bereswill et al. 2012 <sup>5</sup> , Lambropoulou et al. 2000 <sup>29</sup> , Vioque-Fernández et al. 2007 <sup>18</sup>                                                                                                                                                                                                                                                                                                                        |
| Hexachlorobenzene | Chlorinated hydrocarbon | Africa (18)            | 0.212 (0.014) | 0.208  | 0.195-0.240 | Abbassy et al. 1999 <sup>19</sup>                                                                                                                                                                                                                                                                                                                                                                                                               |
|                   |                         | Asia (1)               | 0.070         | NA     | NA          | Singh et al. 2007 <sup>54</sup>                                                                                                                                                                                                                                                                                                                                                                                                                 |
| Iprobenfos        | Organophosphate         | Europe (10)            | 0.132 (0.180) | 0.029  | 0.005-0.52  | Golfinopoulos et al. 2003 <sup>55</sup> , Vryzas et al. 2009 <sup>56</sup> , Greve 1972 <sup>57</sup>                                                                                                                                                                                                                                                                                                                                           |
|                   |                         | Asia (N=81)            | 1.92 (3.92)   | 0.420  | 0.010-24.0  | Añasco et al. 2010 <sup>49</sup> , Iwakuma et al. 1993 <sup>58</sup> , Jeon and Yang 1990 <sup>59</sup> , Nohara and Iwakuma 1996 <sup>60</sup> , Oh et al. 2007 <sup>20</sup> , Shiraishi et al. 1988 <sup>61</sup> , Tanabe et al. 2000 <sup>52</sup> , Tanabe et al. 2001 <sup>42</sup> , Tsuda et al. 1993 <sup>62</sup> , Tsuda et al. 1996 <sup>43</sup>                                                                                  |

**Table S1 continued.**

| Substance                    | Fungicide group           | Continent            | Mean (SD)     | Median | Range        | References                                                                                                                                                                                                                                                                                                                                                                                                                       |
|------------------------------|---------------------------|----------------------|---------------|--------|--------------|----------------------------------------------------------------------------------------------------------------------------------------------------------------------------------------------------------------------------------------------------------------------------------------------------------------------------------------------------------------------------------------------------------------------------------|
| Iprodione                    | Dicarboximide             | Europe (N=1)         | 0.14          | NA     | NA           | Ludvigsen and Lode 2001 <sup>47</sup>                                                                                                                                                                                                                                                                                                                                                                                            |
|                              |                           | North America (N=3)  | 0.049 (0.053) | 0.025  | 0.007-0.028  | Smalling and Orlando 2011 <sup>13</sup>                                                                                                                                                                                                                                                                                                                                                                                          |
| Isoprothiolane               | Phosphorothiolate         | Asia (N=55)          | 2.18 (3.61)   | 0.712  | 0.010-16.8   | Iwafune et al. 2010 <sup>93</sup> , Kawata 2009 <sup>51</sup> , Nagafuchi et al. 1994 <sup>39</sup> , Oh et al. 2007 <sup>20</sup> , Shiraishi et al. 1988 <sup>61</sup> , Sudo et al. 2002 <sup>64</sup> , Sudo et al. 2004 <sup>41</sup> , Tanabe et al. 2000 <sup>52</sup> , Tanabe et al. 2001 <sup>42</sup> , Tsuda et al. 2009 <sup>65</sup> , Golfinoopoulos et al. 2003 <sup>55</sup> , Vryzas et al. 2009 <sup>56</sup> |
| Kresoxim-methyl<br>Metalaxyl | Strobilurin               | Europe (N=14)        | 0.849 (1.08)  | 0.400  | 0.050-3.00   | Numabe and Nagahora 2006 <sup>40</sup>                                                                                                                                                                                                                                                                                                                                                                                           |
|                              | Phenylamide               | Asia (N=5)           | 0.152 (0.062) | 0.150  | 0.080-0.240  | Bereswill et al. 2012 <sup>5</sup> , Espada et al. 2001 <sup>66</sup> , Gandraß et al. 1995 <sup>67</sup> , Ludvigsen and Lode 2001 <sup>47</sup> , Magali et al. 2016 <sup>7</sup> , Maillard et al. 2012 <sup>8</sup> , Papadakis et al. 2015 <sup>17</sup>                                                                                                                                                                    |
| Metconazole<br>Myclobutanil  | Triazole                  | Europe (N=18)        | 1.12 (2.15)   | 0.203  | 0.020-7.70   | Battaglin et al. 2011 <sup>11</sup> , Furtula et al. 2006 <sup>68</sup> , Miles and Pfeuffer 1997 <sup>69</sup> , Phillips and Bode 2004 <sup>16</sup> , Smalling et al. 2018 <sup>70</sup> , Wan et al. 2006 <sup>37</sup>                                                                                                                                                                                                      |
|                              |                           | North America (N=17) | 0.395 (1.33)  | 0.026  | 0.002-5.50   | De Gerónimo et al. 2014 <sup>45</sup>                                                                                                                                                                                                                                                                                                                                                                                            |
| Metconazole<br>Myclobutanil  | Triazole                  | South America (N=2)  | 0.049 (0.024) | 0.049  | 0.025-0.072  | Bereswill et al. 2012 <sup>5</sup> , Süß et al. 2006 <sup>26</sup>                                                                                                                                                                                                                                                                                                                                                               |
|                              |                           | Europe (N=7)         | 1.18 (1.68)   | 0.310  | 0.050-4.70   | Battaglin et al. 2011 <sup>11</sup> , Phillips and Bode 2004 <sup>16</sup> , Smalling and Orlando 2011 <sup>13</sup>                                                                                                                                                                                                                                                                                                             |
| Penconazole<br>Phthalide     | Triazole                  | North America (N=27) | 0.342 (0.616) | 0.079  | 0.004-2.65   | Battaglin et al. 2011 <sup>11</sup> , Phillips and Bode 2004 <sup>16</sup> , Smalling and Orlando 2011 <sup>13</sup>                                                                                                                                                                                                                                                                                                             |
|                              | Unclassified              | Europe (N=10)        | 0.615 (0.758) | 0.315  | 0.016-2.50   | Bereswill et al. 2012 <sup>5</sup> , Süß et al. 2006 <sup>26</sup> , Vioque-Fernández et al. 2007 <sup>18</sup>                                                                                                                                                                                                                                                                                                                  |
| Probenazole<br>Procymidone   | Triazole                  | Asia (N=26)          | 0.352 (0.502) | 0.165  | 0.003-1.90   | Añasco et al. 2010 <sup>49</sup> , Nagafuchi et al. 1994 <sup>39</sup> , Numabe and Nagahora 2006 <sup>40</sup> , Tanabe and Kawata 2009 <sup>51</sup> , Tanabe et al. 2000 <sup>52</sup>                                                                                                                                                                                                                                        |
|                              | Unclassified              | Asia (N=5)           | 0.218 (0.057) | 0.20   | 0.163-0.30   | Tanabe et al. 2001 <sup>42</sup> , Tanabe et al. 2000 <sup>52</sup>                                                                                                                                                                                                                                                                                                                                                              |
| Propiconazole                | Triazole                  | Africa (N=6)         | 2.67 (3.93)   | 0.355  | 0.050-9.06   | Dabrowski et al. 2002 <sup>71</sup>                                                                                                                                                                                                                                                                                                                                                                                              |
|                              |                           | Europe (N=9)         | 0.948 (0.995) | 0.689  | 0.030-3.17   | Espada et al. 2001 <sup>66</sup> , Griffini et al. 1997 <sup>72</sup> , Rabiet et al. 2010 <sup>10</sup>                                                                                                                                                                                                                                                                                                                         |
| Propiconazole                | Triazole                  | Europe (N=18)        | 2.38 (5.03)   | 0.600  | 0.007-20.0   | Kahle et al. 2008 <sup>73</sup> , Kreuger 1998 <sup>46</sup> , Liess et al. 2005 <sup>6</sup> , Long et al. 1998 <sup>53</sup> , Ludvigsen and Lode 2001 <sup>47</sup> , Neumann et al. 2003 <sup>9</sup>                                                                                                                                                                                                                        |
|                              |                           | North America (N=19) | 2.89 (6.04)   | 0.171  | 0.022-24.2   | Battaglin et al. 2011 <sup>11</sup> , Milhome et al. 2015 <sup>15</sup> , Smalling and Orlando 2011 <sup>13</sup> , Smalling et al. 2018 <sup>70</sup>                                                                                                                                                                                                                                                                           |
| Pyraclostrobin               | Strobilurin               | South America (N=1)  | 10.1          | NA     | NA           | Milhome et al. 2015 <sup>15</sup>                                                                                                                                                                                                                                                                                                                                                                                                |
|                              |                           | North America (N=46) | 0.267 (1.06)  | 0.0517 | <0.0001-7.11 | Battaglin et al. 2011 <sup>11</sup> , Reilly et al. 2012 <sup>12</sup> , Smalling and Orlando 2011 <sup>13</sup> , Smalling et al. 2015 <sup>14</sup>                                                                                                                                                                                                                                                                            |
| Pyrimethanil                 | Anilinoypyrimidine        | Africa (N=5)         | 0.560 (0.358) | 0.500  | 0.200-1.10   | Magali et al. 2016 <sup>7</sup> , Stehle et al. 2016 <sup>23</sup>                                                                                                                                                                                                                                                                                                                                                               |
|                              |                           | Europe (N=15)        | 8.02 (14.1)   | 1.90   | 0.051-51.0   | Bereswill et al. 2012 <sup>5</sup> , Süß et al. 2006 <sup>26</sup>                                                                                                                                                                                                                                                                                                                                                               |
| Pyroquilon                   | Unclassified              | North America (N=26) | 0.003 (0.007) | 0.001  | 0.0002-0.38  | Reilly et al. 2012 <sup>12</sup> , Smalling et al., 2015 <sup>14</sup>                                                                                                                                                                                                                                                                                                                                                           |
|                              |                           | Asia (N=21)          | 1.16 (1.77)   | 0.530  | 0.051-7.77   | Ebise and Inoue 2002 <sup>74</sup> , Nagafuchi et al. 1994 <sup>39</sup> , Numabe and Nagahora 2006 <sup>40</sup> , Sudo et al. 2004 <sup>41</sup> , Tsuda et al. 2009 <sup>65</sup>                                                                                                                                                                                                                                             |
| Quintozene                   | Chlorophenyl              | Asia (N=16)          | 2.21 (3.42)   | 0.825  | 0.020-12.0   | Fushiwaki et al. 1994 <sup>75</sup>                                                                                                                                                                                                                                                                                                                                                                                              |
|                              |                           | Europe (N=12)        | 0.149 (0.056) | 0.140  | 0.056-0.229  | Papadakis et al. 2015 <sup>17</sup>                                                                                                                                                                                                                                                                                                                                                                                              |
| Spiroxamine                  | Morpholine                | North America (N=3)  | 0.100 (0.014) | 0.100  | 0.090-0.110  | Tierney et al. 2008 <sup>36</sup> , Wan et al. 2006 <sup>37</sup>                                                                                                                                                                                                                                                                                                                                                                |
|                              |                           | Africa (N=1)         | 0.50          | NA     | NA           | Stehle et al. 2016 <sup>23</sup>                                                                                                                                                                                                                                                                                                                                                                                                 |
| Tebuconazole                 | Triazole                  | Europe (N=2)         | 0.235 (0.035) | 0.235  | 0.235-0.270  | Bereswill et al. 2012 <sup>5</sup>                                                                                                                                                                                                                                                                                                                                                                                               |
|                              |                           | Africa (N=4)         | 1.70 (1.34)   | 1.55   | 0.400-3.30   | Stehle et al. 2016 <sup>23</sup>                                                                                                                                                                                                                                                                                                                                                                                                 |
| Tebuconazole                 | Triazole                  | Europe (N=34)        | 3.40 (13.9)   | 0.143  | 0.0004-81.0  | Berenzen et al. 2005 <sup>4</sup> , Kahle et al. 2008 <sup>73</sup> , Lefrancq et al. 2017 <sup>38</sup> , Liess et al. 2005 <sup>6</sup> , Magali et al. 2016 <sup>7</sup> , Maillard et al. 2012 <sup>8</sup> , Rabiet et al. 2010 <sup>10</sup> , Schäfer et al. 2007 <sup>76</sup>                                                                                                                                           |
|                              |                           | North America (N=2)  | 0.089 (0.037) | 0.089  | 0.063-0.115  | Battaglin et al. 2011 <sup>11</sup> , Smalling et al., 2015 <sup>14</sup>                                                                                                                                                                                                                                                                                                                                                        |
| Tetraconazole                | Triazole                  | South America (N=2)  | 0.033 (0.004) | 0.033  | 0.030-0.035  | De Gerónimo et al. 2014 <sup>45</sup>                                                                                                                                                                                                                                                                                                                                                                                            |
|                              |                           | Europe (N=3)         | 2.30 (3.17)   | 0.090  | 0.020-6.8    | Lefrancq et al. 2017 <sup>38</sup> , Magali et al. 2016 <sup>7</sup> , Maillard et al. 2012 <sup>8</sup>                                                                                                                                                                                                                                                                                                                         |
| Thiabendazole<br>Triadimenol | Benzimidazole<br>Triazole | North America (N=1)  | 0.047         | NA     | NA           | Battaglin et al. 2011 <sup>11</sup>                                                                                                                                                                                                                                                                                                                                                                                              |
|                              |                           | Europe (N=1)         | 0.22          | NA     | NA           | Ludvigsen and Lode 2001 <sup>47</sup>                                                                                                                                                                                                                                                                                                                                                                                            |
| Thiabendazole<br>Triadimenol | Triazole                  | Europe (N=5)         | 1.71 (1.11)   | 0.91   | 0.18-4.0     | Kreuger 1998 <sup>46</sup> , Lefrancq et al. 2017 <sup>38</sup> , Süß et al. 2006 <sup>26</sup>                                                                                                                                                                                                                                                                                                                                  |
|                              |                           | North America (N=1)  | 0.070         | NA     | NA           | Diepens et al. 2014 <sup>32</sup>                                                                                                                                                                                                                                                                                                                                                                                                |
| Tricyclazole                 | Triazolobenzothiazole     | Asia (N=7)           | 1.99 (2.10)   | 1.70   | 0.036-5.80   | Tanabe and Kawata 2009 <sup>51</sup> , Tanabe et al. 2000 <sup>52</sup> , Tanabe et al. 2001 <sup>42</sup>                                                                                                                                                                                                                                                                                                                       |
|                              |                           | Europe (N=20)        | 2.80 (4.83)   | 0.745  | 0.050-15.6   | Padovani et al. 2006 <sup>77</sup>                                                                                                                                                                                                                                                                                                                                                                                               |
| Trifloxystrobin              | Strobilurin               | Europe (N=2)         | 2.47 (1.63)   | 2.47   | 0.83-4.1     | Bereswill et al. 2012 <sup>5</sup>                                                                                                                                                                                                                                                                                                                                                                                               |
|                              |                           | North America (N=1)  | 0.029         | NA     | NA           | Battaglin et al. 2011 <sup>11</sup>                                                                                                                                                                                                                                                                                                                                                                                              |
| Zoxamide                     | Benzamide                 | Africa (N=10)        | 0.33 (0.257)  | 0.250  | 0.10-0.90    | Stehle et al. 2016 <sup>23</sup>                                                                                                                                                                                                                                                                                                                                                                                                 |

\*Fungicide classes that were observed as part of the literature review but were not included due to their limited observations (less than 10): Acylamino acid (benalaxyl), aromatic hydrocarbons (etridiazole), benzanilide (mepromil), dithiocarbamate (iprodione, thiram), cyanoacetamide oxime (cyromoxanil), cyanoimidazole (cyazofamid), imidazole (imazalil, prochloraz), organochlorine (pentachlorophenol), oxazole (famoxadone), phenylpyridinamine (fluazinam), phenylpyrrole (fludioxinil), phenylurea (pencycuron), quinoline (quinoxifen), substituted benzene (chloroneb), sulphamide (dichlorfluand).

LOWEST EFFECT CONCENTRATIONS

**Table S2.** Lowest effect concentrations for fungicide groups identified in the peer-reviewed literature.

| Fungicide group  | Organism group | Substance      | Concentration (µg/L) | Reference                                  |
|------------------|----------------|----------------|----------------------|--------------------------------------------|
| DMIs             | Microbes       | Clotrimazole   | 0.0172               | Porsbring et al. 2009 <sup>78</sup>        |
|                  | Plants         | Climbazole     | 13                   | Richter et al. 2013 <sup>79</sup>          |
|                  | Invertebrates  | Clotrimazole   | 0.14                 | Gonzalez-Ortegon et al. 2013 <sup>80</sup> |
|                  | Vertebrates    | Tebuconazole   | 5                    | Bernabò et al. 2016 <sup>81</sup>          |
| Strobilurins     | Microbes       | Azoxystrobin   | 0.004                | Dijksterhuis et al. 2011 <sup>82</sup>     |
|                  | Plants         | Azoxystrobin   | 3.3                  | van Wijngaarden et al. 2014 <sup>83</sup>  |
|                  | Invertebrates  | Azoxystrobin   | 0.026                | Warming et al. 2009 <sup>84</sup>          |
|                  | Vertebrates    | Pyraclostrobin | 5                    | Hooser et al. 2012 <sup>85</sup>           |
| Benzimidazoles   | Microbes       | Carbendazim    | 35                   | Zubrod et al. 2015 <sup>86</sup>           |
|                  | Plants         |                | nd                   |                                            |
|                  | Invertebrates  | Carbendazim    | 5                    | Silva et al. 2015 <sup>87</sup>            |
|                  | Vertebrates    | Carbendazim    | 1648                 | Rico et al. 2011 <sup>88</sup>             |
| Chloronitriles   | Microbes       | Chlorothalonil | 0.0176               | McMahon et al. 2013 <sup>89</sup>          |
|                  | Plants         | Chlorothalonil | 94                   | Belgers et al. 2009 <sup>90</sup>          |
|                  | Invertebrates  | Chlorothalonil | 0.5                  | Bellas 2006 <sup>91</sup>                  |
|                  | Vertebrates    | Chlorothalonil | 0.0164               | McMahon et al. 2011 <sup>92</sup>          |
| Dithiocarbamates | Microbes       | Mancozeb       | 0.57                 | Rohr et al. 2017 <sup>93</sup>             |
|                  | Plants         |                | na                   |                                            |
|                  | Invertebrates  | Mancozeb       | 3.3                  | Mo et al. 2016 <sup>94</sup>               |
|                  | Vertebrates    | Maneb          | 50                   | Gürkan and Hayretdağ 2015 <sup>95</sup>    |

nd = not detected; na = not available

## FUNGICIDE RACs

**Table S3.** Regulatory acceptable concentrations (RACs) as compiled by Zubrod et al.<sup>86</sup> RACs were obtained from the respective “conclusion on pesticide review” by the European Food Safety Authority (EFSA) or – if the former was not available – the review report by the European Commission’s Directorate General for Health & Consumers. Only RACs that could be identified unequivocally were included.

| Fungicide group  | Substance                   | RAC   |
|------------------|-----------------------------|-------|
| DMIs             | Bromuconazole               | 2     |
|                  | Cyproconazole               | 2.3   |
|                  | Difenoconazole              | 0.56  |
|                  | Epoxiconazole               | 0.43  |
|                  | Fenbuconazole               | 0.6   |
|                  | Fluquinconazole             | 1.4   |
|                  | Flutriafol                  | 1.3   |
|                  | Imazalil (aka enilconazole) | 8.85  |
|                  | Metconazole                 | 0.291 |
|                  | Myclobutanil                | 2.4   |
|                  | Penconazole                 | 3.2   |
|                  | Prochloraz                  | 0.55  |
|                  | Propiconazole               | 5.01  |
|                  | Prothioconazole             | 56    |
|                  | Tebuconazole                | 1     |
|                  | Tetraconazole               | 4.2   |
|                  | Triadimenol                 | 10    |
| Triflumizole     | 4.4                         |       |
| Triticonazole    | 1                           |       |
| Strobilurins     | Azoxystrobin                | 3.3   |
|                  | Dimoxystrobin               | 1     |
|                  | Famoxadone                  | 0.12  |
|                  | Fenamidone                  | 0.53  |
|                  | Fluoxastrobin               | 0.061 |
|                  | Kresoxim-methyl             | 11    |
|                  | Pyraclostrobin              | 0.06  |
| Benzimidazoles   | Trifloxystrobin             | 0.11  |
|                  | Carbendazim                 | 0.15  |
|                  | Fuberidazole                | 9.1   |
|                  | Thiabendazole               | 4.2   |
| Chloronitriles   | Chlorothalonil              | 3.3   |
| Dithiocarbamates | Dazomet                     | 0.4   |
|                  | Metam                       | 0.531 |
|                  | Metiram                     | 0.43  |
|                  | Propineb                    | 2.6   |

# FUNGICIDE RISK QUOTIENTS

**Table S4.** Risk quotients (ratio of maximum detected field concentrations [Table S1; substances with ≥10 observations] and toxicity data provided by the Pesticide Properties DataBase<sup>2</sup>) for algae, fish, and invertebrates separated by continent and global. Risk quotients >0.01 (underlined) and >0.1 (double underlined) indicate moderate and high risks, respectively. Italics indicate an unclear risk (i.e., toxicity value provided as “greater than” value).

| Substance          | Africa         |                |                | Asia           |                |                 | Europe         |                |                | North America  |                |                | South America  |                |                | Global         |                |                 |
|--------------------|----------------|----------------|----------------|----------------|----------------|-----------------|----------------|----------------|----------------|----------------|----------------|----------------|----------------|----------------|----------------|----------------|----------------|-----------------|
|                    | Algae          | Fish           | Inv.           | Algae          | Fish           | Inv.            | Algae          | Fish           | Inv.           | Algae          | Fish           | Inv.           | Algae          | Fish           | Inv.           | Algae          | Fish           | Inv.            |
| Azoxystrobin       | NA             | NA             | NA             | NA             | NA             | NA              | <u>0.08250</u> | <u>0.06319</u> | <u>0.12913</u> | <u>0.01264</u> | 0.00968        | <u>0.01978</u> | 0.00378        | 0.00289        | 0.00591        | <u>0.08250</u> | <u>0.06319</u> | <u>0.12913</u>  |
| Boscalid           | NA             | NA             | NA             | NA             | NA             | NA              | 0.00640        | 0.00889        | 0.00450        | 0.00960        | <u>0.01333</u> | 0.00675        | NA             | NA             | NA             | 0.00960        | <u>0.01333</u> | 0.00675         |
| Captan             | 0.00003        | 0.00020        | 0.00001        | 0.00032        | 0.00204        | 0.00005         | 0.00055        | 0.00349        | 0.00009        | 0.00018        | 0.00117        | 0.00003        | NA             | NA             | NA             | 0.00055        | 0.00349        | 0.00009         |
| Carbendazim        | <0.00032       | <u>0.01316</u> | <u>0.01667</u> | NA             | NA             | NA              | <0.00084       | <u>0.03421</u> | <u>0.04333</u> | NA             | NA             | NA             | <0.00058       | <u>0.02368</u> | <u>0.03000</u> | <0.00032       | <u>0.03421</u> | <u>0.04333</u>  |
| Chlorothalonil     | NA             | NA             | NA             | 0.00333        | <u>0.04118</u> | <u>0.01296</u>  | 0.00033        | 0.00412        | 0.00130        | 0.00476        | <u>0.05882</u> | <u>0.01852</u> | NA             | NA             | NA             | 0.00476        | <u>0.05882</u> | <u>0.01852</u>  |
| Cyprodinil         | NA             | NA             | NA             | NA             | NA             | NA              | 0.00092        | 0.00100        | <u>0.01091</u> | 0.00007        | 0.00007        | 0.00080        | NA             | NA             | NA             | 0.00092        | 0.00100        | <u>0.01091</u>  |
| Dimethomorph       | 0.00001        | 0.00006        | <0.00002       | NA             | NA             | NA              | <i>0.00120</i> | <u>0.01029</u> | <0.00330       | NA             | NA             | NA             | NA             | NA             | NA             | 0.00120        | <u>0.01029</u> | <0.00330        |
| Edifenphos         | NA             | NA             | NA             | NA             | 0.00353        | <u>47.50000</u> | NA             | 0.00353        | <u>47.50000</u> |
| Epoxiconazole      | NA             | NA             | NA             | NA             | NA             | NA              | 0.00471        | 0.00178        | 0.00064        | 0.00050        | 0.00019        | 0.00007        | 0.00004        | 0.00002        | 0.00001        | 0.00471        | 0.00178        | 0.00064         |
| Fenpropimorph      | NA             | NA             | NA             | NA             | NA             | NA              | <u>0.03670</u> | 0.00522        | 0.00536        | NA             | NA             | NA             | NA             | NA             | NA             | <u>0.03670</u> | 0.00522        | 0.00536         |
| Flutolanil         | NA             | NA             | NA             | <u>0.03124</u> | 0.00561        | <0.00446        | NA             | <u>0.03124</u> | 0.00561        | <0.00446        |
| Hexachloro-benzene | <u>0.02400</u> | 0.00800        | 0.00048        | 0.00700        | 0.00233        | 0.00014         | <u>0.05200</u> | <u>0.01733</u> | 0.00104        | NA             | NA             | NA             | NA             | NA             | NA             | <u>0.05200</u> | <u>0.01733</u> | 0.00104         |
| Iprobenfos         | NA             | NA             | NA             | 0.00397        | 0.00163        | <0.02           | NA             | 0.00397        | 0.00163        | <0.02           |
| Isoprothiolane     | NA             | NA             | NA             | 0.00367        | 0.00247        | 0.00027         | NA             | 0.00367        | 0.00247        | 0.00027         |
| Kresoxim-methyl    | NA             | NA             | NA             | NA             | NA             | NA              | <u>0.04762</u> | <u>0.01579</u> | <u>0.01613</u> | NA             | NA             | NA             | NA             | NA             | NA             | <u>0.04762</u> | <u>0.01579</u> | <u>0.01613</u>  |
| Metalaxyl          | NA             | NA             | NA             | 0.00057        | 0.00025        | 0.00007         | <u>0.01833</u> | 0.00802        | 0.00222        | <u>0.01310</u> | 0.00573        | 0.00159        | NA             | NA             | NA             | <u>0.01833</u> | 0.00802        | 0.00222         |
| Myclobutanil       | NA             | NA             | NA             | NA             | NA             | NA              | 0.00177        | 0.00235        | 0.00028        | 0.00100        | 0.00133        | 0.00016        | NA             | NA             | NA             | 0.00177        | 0.00235        | 0.00028         |
| Penconazole        | NA             | NA             | NA             | NA             | NA             | NA              | 0.00051        | 0.00221        | 0.00037        | NA             | NA             | NA             | NA             | NA             | NA             | 0.00051        | 0.00221        | 0.00037         |
| Phthalide          | NA             | NA             | NA             | 0.000001       | 5.94E-06       | 0.00005         | NA             | 0.000001       | 5.94E-06       | 0.00005         |
| Procymidone        | 0.00348        | 0.00125        | <0.00503       | NA             | NA             | NA              | 0.00122        | 0.00044        | <0.00176       | NA             | NA             | NA             | NA             | NA             | NA             | 0.00348        | 0.00125        | <0.00503        |
| Propiconazole      | NA             | NA             | NA             | NA             | NA             | NA              | <u>0.21505</u> | 0.00769        | 0.00196        | <u>0.26022</u> | 0.00931        | 0.00237        | <u>0.10860</u> | 0.00388        | 0.001          | <u>0.26022</u> | 0.00931        | 0.00237         |
| Pyraclostrobin     | NA             | NA             | NA             | NA             | NA             | NA              | NA             | NA             | NA             | <0.00843       | <u>1.18500</u> | <u>0.44438</u> | NA             | NA             | NA             | <0.00843       | <u>1.18500</u> | <u>0.44438</u>  |
| Pyrimethanil       | 0.00092        | 0.00010        | 0.00038        | NA             | NA             | NA              | <u>0.04250</u> | 0.00483        | <u>0.01759</u> | 0.00032        | 0.00004        | 0.00013        | NA             | NA             | NA             | <u>0.04250</u> | 0.00483        | <u>0.01759</u>  |
| Pyroquilon         | NA             | NA             | NA             | NA             | 0.00060        | 0.00013         | NA             | 0.00060        | 0.00013         |
| Quintozene         | NA             | NA             | NA             | NA             | <u>0.12000</u> | <u>0.01558</u>  | NA             | 0.00229        | 0.00030        | NA             | 0.00110        | 0.00014        | NA             | NA             | NA             | NA             | <u>0.12000</u> | <u>0.01558</u>  |
| Tebuconazole       | 0.00168        | 0.00075        | 0.00118        | NA             | NA             | NA              | <u>0.04133</u> | <u>0.01841</u> | <u>0.02903</u> | 0.00006        | 0.00003        | 0.00004        | 0.00002        | 0.00001        | 0.00001        | <u>0.04133</u> | <u>0.01841</u> | <u>0.02903</u>  |
| Tricyclazole       | NA             | NA             | NA             | 0.00071        | 0.00079        | 0.00017         | 0.00190        | 0.00214        | 0.00046        | NA             | NA             | NA             | NA             | NA             | NA             | 0.00190        | 0.00214        | 0.00046         |
| Zoxamide           | <0.00115       | 0.00563        | <u>0.08182</u> | NA             | NA             | NA              | NA             | NA             | NA             | NA             | NA             | NA             | NA             | NA             | NA             | <0.00115       | 0.00563        | <u>0.08182</u>  |



## LITERATURE CITED IN THIS SUPPLEMENT

1. Maltby, L.; Brock, T. C. M.; van den Brink, P. J., Fungicide risk assessment for aquatic ecosystems: importance of interspecific variation, toxic mode of action, and exposure regime. *Environ. Sci. Technol.* **2009**, *43*, (19), 7556-7563.
2. FOOTPRINT The FOOTPRINT Pesticide Properties Database. Database collated by the University of Hertfordshire as part of the EU-funded FOOTPRINT project (FP6-SSP-022704). [www.eu-footprint.org/ppdb.html](http://www.eu-footprint.org/ppdb.html)
3. Knäbel, A.; Meyer, K.; Rapp, J.; Schulz, R., Fungicide field concentrations exceed FOCUS surface water predictions: urgent need of model improvement. *Environ. Sci. Technol.* **2014**, *48*, 455-463.
4. Berenzen, N.; Lentzen-Godding, A.; Probst, M.; Schulz, H.; Schulz, R.; Liess, M., A comparison of predicted and measured levels of runoff-related pesticide concentrations in small lowland streams on a landscape level. *Chemosphere* **2005**, *58*, 683-691.
5. Bereswill, R.; Golla, B.; Strelake, M.; Schulz, R., Entry and toxicity of organic pesticides and copper in vineyard streams: erosion rills jeopardise the efficiency of riparian buffer strips. *Agric. Ecosyst. Environ.* **2012**, *146*, (1), 81-92.
6. Liess, M.; von der Ohe, P. C., Analyzing effects of pesticides on invertebrate communities in streams. *Environ. Toxicol. Chem.* **2005**, *24*, (4), 954-965.
7. Magali, B.; Sylvain, L.; Eric, C., Litter breakdown for ecosystem integrity assessment also applies to streams affected by pesticides. *Hydrobiologia* **2016**, *773*, (1), 87-102.
8. Maillard, E.; Payraudeau, S.; Ortiz, F.; Imfeld, G., Removal of dissolved pesticide mixtures by a stormwater wetland receiving runoff from a vineyard catchment: an inter-annual comparison. *Int. J. Environ. Anal. Chem.* **2012**, *92*, (8), 979-994.
9. Neumann, M.; Baumeister, J.; Liess, M.; Schulz, R., LIMPACT: Ein Expertensystem zur Abschätzung der Pflanzenschutzmittel-Belastung kleiner Fließgewässer mittels der Makroinvertebraten-Fauna. *Umweltwiss. Schadst.-Forsch.* **2003**, *15*, (3), 152-156.
10. Rabiet, M.; Margoum, C.; Gouy, V.; Carluer, N.; Coquery, M., Assessing pesticide concentrations and fluxes in the stream of a small vineyard catchment - effect of sampling frequency. *Environ. Pollut.* **2010**, *158*, (3), 737-748.
11. Battaglin, W.; Sandstrom, M.; Kuivila, K.; Kolpin, D.; Meyer, M., Occurrence of azoxystrobin, propiconazole, and selected other fungicides in US streams, 2005-2006. *Water, Air, Soil Pollut.* **2011**, *218*, (1), 307-322.
12. Reilly, T. J.; Smalling, K. L.; Orlando, J. L.; Kuivila, K. M., Occurrence of boscalid and other selected fungicides in surface water and groundwater in three targeted use areas in the United States. *Chemosphere* **2012**, *89*, (3), 228-234.
13. Smalling, K. L.; Orlando, J. L., *Occurrence of pesticides in surface water and sediments from three Central California coastal watersheds, 2008-09*. US Geological Survey: 2011.
14. Smalling, K. L.; Reeves, R.; Muths, E.; Vandever, M.; Battaglin, W. A.; Hladik, M. L.; Pierce, C. L., Pesticide concentrations in frog tissue and wetland habitats in a landscape dominated by agriculture. *Sci. Total Environ.* **2015**, *502*, 80-90.
15. Milhome, M.; Sousa, P.; Lima, F.; Nascimento, R., Influence the use of pesticides in the quality of surface and groundwater located in irrigated areas of Jaguaribe, Ceara, Brazil. *International Journal of Environmental Research* **2015**, *9*, (1), 255-262.
16. Phillips, P. J.; Bode, R. W., Pesticides in surface water runoff in south-eastern New York State, USA: seasonal and stormflow effects on concentrations. *Pest Management Science: formerly Pesticide Science* **2004**, *60*, (6), 531-543.
17. Papadakis, E.-N.; Tsaboula, A.; Kotopoulou, A.; Kintzikoglou, K.; Vryzas, Z.; Papadopoulou-Mourkidou, E., Pesticides in the surface waters of Lake Vistonis Basin, Greece: Occurrence and environmental risk assessment. *Sci. Total Environ.* **2015**, *536*, 793-802.
18. Vioque-Fernández, A.; de Almeida, E. A.; Ballesteros, J.; García-Barrera, T.; Gómez-Ariza, J.-L.; López-Barea, J., Donana National Park survey using crayfish (*Procambarus clarkii*) as bioindicator: esterase inhibition and pollutant levels. *Toxicol. Lett.* **2007**, *168*, (3), 260-268.
19. Abbassy, M.; Ibrahim, H.; El-Amayem, M. A., Occurrence of pesticides and polychlorinated biphenyls in water of the Nile river at the estuaries of Rosetta and Damietta branches, north of Delta, Egypt. *Journal of Environmental Science & Health Part B* **1999**, *34*, (2), 255-267.
20. Oh, Y. J.; Jung, Y. J.; Kang, J.-W.; Yoo, Y. S., Investigation of the estrogenic activities of pesticides from Paldang reservoir by in vitro assay. *Sci. Total Environ.* **2007**, *388*, (1-3), 8-15.
21. Angelidis, M.; Markantonatos, P.; Bacalis, N. C.; Albanis, T., Seasonal fluctuations of nutrients and pesticides in the basin of Evrotas river, Greece. *Journal of Environmental Science & Health Part A* **1996**, *31*, (2), 387-410.
22. Jimenez, J.; Bernal, J.; del Nozal, M. J.; Rivera, J. M., Determination of pesticide residues in waters from small loughs by solid-phase extraction and combined use of gas chromatography with electron-capture and nitrogen-phosphorus detection and high-performance liquid chromatography with diode array detection. *J. Chromatogr. A* **1997**, *778*, (1-2),

289-300.

23. Stehle, S.; Dabrowski, J. M.; Bangert, U.; Schulz, R., Erosion rills offset the efficacy of vegetated buffer strips to mitigate pesticide exposure in surface waters. *Sci. Total Environ.* **2016**, *545*, 171-183.
24. Readman, J.; Albanis, T.; Barcelo, D.; Galassi, S.; Tronczynski, J.; Gabrielides, G., Fungicide contamination of Mediterranean estuarine waters: results from a MED POL pilot survey. *Mar. Pollut. Bull.* **1997**, *34*, (4), 259-263.
25. Sancho, J. V.; Pozo, O. J.; Hernández, F., Liquid chromatography and tandem mass spectrometry: a powerful approach for the sensitive and rapid multiclass determination of pesticides and transformation products in water. *Analyst* **2004**, *129*, (1), 38-44.
26. Süß, A.; Bischoff, G.; Müller, C. W.; Buhr, L., Chemisch-biologisches Monitoring zu Pflanzenschutzmittelbelastung und Lebensgemeinschaften in Gräben des Alten Landes. *Nachrichtenblatt des Deutschen Pflanzenschutzdienstes* **2006**, *58*, (2), 28-42.
27. Palma, G.; Sánchez, A.; Olave, Y.; Encina, F.; Palma, R.; Barra, R., Pesticide levels in surface waters in an agricultural-forestry basin in Southern Chile. *Chemosphere* **2004**, *57*, (8), 763-770.
28. Sangchan, W.; Bannwarth, M.; Ingwersen, J.; Hugenschmidt, C.; Schwadorf, K.; Thavornnyutikarn, P.; Pansombat, K.; Streck, T., Monitoring and risk assessment of pesticides in a tropical river of an agricultural watershed in northern Thailand. *Environ. Monit. Assess.* **2014**, *186*, (2), 1083-1099.
29. Lambropoulou, D. A.; Konstantinou, I. K.; Albanis, T. A., Determination of fungicides in natural waters using solid-phase microextraction and gas chromatography coupled with electron-capture and mass spectrometric detection. *J. Chromatogr. A* **2000**, *893*, (1), 143-156.
30. Arnold, G.; Luckenbach, M.; Unger, M., Runoff from tomato cultivation in the estuarine environment: biological effects of farm management practices. *J. Exp. Mar. Biol. Ecol.* **2004**, *298*, (2), 323-346.
31. Castillo, L. E.; Ruepert, C.; Solis, E., Pesticide residues in the aquatic environment of banana plantation areas in the north atlantic zone of Costa Rica. *Environ. Toxicol. Chem.* **2000**, *19*, (8), 1942-1950.
32. Diepens, N. J.; Pfennig, S.; Van den Brink, P. J.; Gunnarsson, J. S.; Ruepert, C.; Castillo, L., Effect of pesticides used in banana and pineapple plantations on aquatic ecosystems in Costa Rica. *J. Environ. Biol.* **2014**, *35*, (sp. issue), 73-84.
33. Lehotay, S. J.; Harman-Fetcho, J. A.; McConnell, L. L., Agricultural pesticide residues in oysters and water from two Chesapeake Bay tributaries. *Mar. Pollut. Bull.* **1998**, *37*, (1), 32-44.
34. LeNoir, J. S.; McConnell, L. L.; Fellers, G. M.; Cahill, T. M.; Seiber, J. N., Summertime transport of current-use pesticides from California's Central Valley to the Sierra Nevada Mountain Range, USA. *Environ. Toxicol. Chem.* **1999**, *18*, (12), 2715-2722.
35. Scott, G.; Fulton, M.; Wirth, E.; Chandler, G.; Key, P.; Daugomah, J.; Bearden, D.; Chung, K.; Strozier, E.; DeLorenzo, M., Toxicological studies in tropical ecosystems: an ecotoxicological risk assessment of pesticide runoff in south Florida estuarine ecosystems. *J. Agric. Food Chem.* **2002**, *50*, (15), 4400-4408.
36. Tierney, K. B.; Sampson, J. L.; Ross, P. S.; Sekela, M. A.; Kennedy, C. J., Salmon olfaction is impaired by an environmentally realistic pesticide mixture. *Environ. Sci. Technol.* **2008**, *42*, (13), 4996-5001.
37. Wan, M. T.; Kuo, J.-N.; McPherson, B.; Pasternak, J., Agricultural pesticide residues in farm ditches of the Lower Fraser Valley, British Columbia, Canada. *Journal of Environmental Science and Health Part B* **2006**, *41*, (5), 647-669.
38. Lefrancq, M.; Jadas-Hécart, A.; La Jeunesse, I.; Landry, D.; Payraudeau, S., High frequency monitoring of pesticides in runoff water to improve understanding of their transport and environmental impacts. *Sci. Total Environ.* **2017**, *587*, 75-86.
39. Nagafuchi, O.; Inoue, T.; Ebise, S., Runoff pattern of pesticides from paddy fields in the catchment-area of Rikimaru reservoir, Japan. *Water Sci. Technol.* **1994**, *30*, 137-144.
40. Numabe, A.; Nagahora, S., Estimation of pesticide runoff from paddy fields to rural rivers. *Water Sci. Technol.* **2006**, *53*, (2), 139-146.
41. Sudo, M.; Kawachi, T.; Hida, Y.; Kunimatsu, T., Spatial distribution and seasonal changes of pesticides in Lake Biwa, Japan. *Limnology* **2004**, *5*, (2), 77-86.
42. Tanabe, A.; Mitobe, H.; Kawata, K.; Yasuhara, A.; Shibamoto, T., Seasonal and spatial studies on pesticide residues in surface waters of the Shinano River in Japan. *J. Agric. Food Chem.* **2001**, *49*, (8), 3847-3852.
43. Tsuda, T.; Inoue, T.; Kojima, M.; Aoki, S., Pesticides in water and fish from rivers flowing into Lake Biwa. *Bull. Environ. Contam. Toxicol.* **1996**, *57*, (3), 442-449.
44. Neumann, M.; Schulz, R.; Schäfer, K.; Müller, W.; Mannheller, W.; Liess, M., The significance of entry routes as point and non-point sources of pesticides in small streams. *Water Res.* **2002**, *36*, (4), 835-842.
45. De Gerónimo, E.; Aparicio, V. C.; Bárbaro, S.; Portocarrero, R.; Jaime, S.; Costa, J. L., Presence of pesticides

- in surface water from four sub-basins in Argentina. *Chemosphere* **2014**, *107*, 423-431.
46. Kreuger, J., Pesticides in stream water within an agricultural catchment in southern Sweden, 1990-1996. *The Science of The Total Environment* **1998**, *216*, (3), 227-251.
  47. Ludvigsen, G. H.; Lode, O., Results from "JOVA" - The agricultural and environmental monitoring program of pesticides in Norway 1995-1999. *Fresenius Environ. Bull.* **2001**, *10*, 470-474.
  48. Turnbull, A.; Harrison, R.; Williams, R.; Matthiessen, P.; Brooke, D.; Sheahan, D.; Mills, M., Assessment of the fate of selected adsorptive pesticides at ADAS Rosemaund. *Water and Environment Journal* **1997**, *11*, (1), 24-30.
  49. Añasco, N.; Uno, S.; Koyama, J.; Matsuoka, T.; Kuwahara, N., Assessment of pesticide residues in freshwater areas affected by rice paddy effluents in Southern Japan. *Environ. Monit. Assess.* **2010**, *160*, (1-4), 371.
  50. Okamura, H.; Omori, M.; Luo, R.; Aoyama, I.; Liu, D., Application of short-term bioassay guided chemical analysis for water quality of agricultural land run-off. *Sci. Total Environ.* **1999**, *234*, (1-3), 223-231.
  51. Tanabe, A.; Kawata, K., Daily variation of pesticides in surface water of a small river flowing through paddy field area. *Bull. Environ. Contam. Toxicol.* **2009**, *82*, (6), 705-10.
  52. Tanabe, A.; Mitobe, H.; Kawata, K.; Sakai, M.; Yasuhara, A., New monitoring system for ninety pesticides and related compounds in river water by solid-phase extraction with determination by gas chromatography/mass spectrometry. *J. AOAC Int.* **2000**, *83*, (1), 61-77.
  53. Long, J. L.; House, W. A.; Parker, A.; Rae, J. E., Micro-organic compounds associated with sediments in the Humber rivers. *Sci. Total Environ.* **1998**, *210*, 229-253.
  54. Singh, K. P.; Malik, A.; Sinha, S., Persistent organochlorine pesticide residues in soil and surface water of northern Indo-Gangetic alluvial plains. *Environ. Monit. Assess.* **2007**, *125*, (1-3), 147-155.
  55. Golfopoulos, S. K.; Nikolaou, A. D.; Kostopoulou, M. N.; Xilourgidis, N. K.; Vagi, M. C.; Lekkas, D. T., Organochlorine pesticides in the surface waters of Northern Greece. *Chemosphere* **2003**, *50*, (4), 507-516.
  56. Vryzas, Z.; Vassiliou, G.; Alexoudis, C.; Papadopoulou-Mourkidou, E., Spatial and temporal distribution of pesticide residues in surface waters in northeastern Greece. *Water Res.* **2009**, *43*, (1), 1-10.
  57. Greve, P., Potentially hazardous substances in surface waters. *Sci. Total Environ.* **1972**, *1*, (2), 173-180.
  58. Iwakuma, T.; Shiraishi, H.; Nohara, S.; Takamura, K., Runoff properties and change in concentrations of agricultural pesticides in a river system during a rice cultivation period. *Chemosphere* **1993**, *27*, (4), 677-691.
  59. Jeon, D. S.; Yang, J. S., Determination of organophosphorous pesticides in Suncheon Bay. *The Journal of the Oceanological Society of Korea* **1990**, *25*, 21-25.
  60. Nohara, S.; Iwakuma, T., Pesticide residues in water and an aquatic plant, *Nelumbo nucifera*, in a river mouth at Lake Kasumigaura, Japan. *Chemosphere* **1996**, *33*, (7), 1409-1416.
  61. Shiraishi, H.; Pula, F.; Otsuki, A.; Iwakuma, T., Behaviour of pesticides in Lake Kasumigaura, Japan. *Sci. Total Environ.* **1988**, *72*, 29-42.
  62. Tsuda, T.; Aoki, S.; Kojima, M.; Harada, H., Pesticides in water and fish from rivers flowing into lake Biwa. *Toxicol. Environ. Chem.* **1993**, *34*, 39-55.
  63. Iwafune, T.; Inao, K.; Horio, T.; Iwasaki, N.; Yokoyama, A.; Nagai, T., Behavior of paddy pesticides and major metabolites in the Sakura River, Ibaraki, Japan. *J. Pestic. Sci.* **2010**, *35*, (2), 114-123.
  64. Sudo, M.; Kunimatsu, T.; Okubo, T., Concentration and loading of pesticide residues in Lake Biwa basin (Japan). *Water Res.* **2002**, *36*, (1), 315-329.
  65. Tsuda, T.; Nakamura, T.; Inoue, A.; Tanaka, K., Pesticides in Water and Sediment from Littoral Area of Lake Biwa. *Bulletin Of Environmental Contamination And Toxicology* **2009**, *82*, (6), 683-689.
  66. Espada, M. P.; Frenich, A. G.; Vidal, J. M.; Parrilla, P., Comparative study using ECD, NPD, and MS/MS chromatographic techniques in the determination of pesticides in wetland waters. *Anal. Lett.* **2001**, *34*, (4), 597-614.
  67. Gandraß, J.; Bormann, G.; Wilken, R.-D., N-/P-pesticides in the Czech and German part of the river Elbe—Analytical methods and trends of pollution. *Fresenius. J. Anal. Chem.* **1995**, *353*, (1), 70-74.
  68. Furtula, V.; Derksen, G.; Colodey, A., Application of automated mass spectrometry deconvolution and identification software for pesticide analysis in surface waters. *Journal of Environmental Science and Health Part B* **2006**, *41*, (8), 1259-1271.
  69. Miles, C.; Pfeuffer, R., Pesticides in canals of South Florida. *Arch. Environ. Contam. Toxicol.* **1997**, *32*, (4), 337-345.
  70. Smalling, K. L.; Bunnell, J. F.; Cohl, J.; Romanok, K. M.; Hazard, L.; Monsen, K.; Akob, D. M.; Hansen, A.; Hladik, M. L.; Abdallah, N.; Ahmed, Q.; Assan, A.; De Parsia, M.; Griggs, A.; McWayne-Holmes, M.; Patel, N.; Sanders, C.; Shrestha, Y.; Stout, S.; Williams, B., An initial comparison of pesticides and amphibian pathogens between natural and created wetlands in the New Jersey Pinelands, 2014–16. *U.S. Geological Survey Open-File Report* **2018**, *2018-1077*.
  71. Dabrowski, J.; Peall, S.; Reinecke, A.; Liess, M.; Schulz, R., Runoff-related pesticide input into the Lourens

- River, South Africa: basic data for exposure assessment and risk mitigation at the catchment scale. *Water, Air, Soil Pollut.* **2002**, *135*, (1-4), 265-283.
72. Griffini, O.; Bao, M.; Barbieri, C.; Burrini, D.; Pantani, F., Occurrence of pesticides in the Arno river and in potable water—a survey of the period 1992–1995. *Bull. Environ. Contam. Toxicol.* **1997**, *59*, (2), 202-209.
73. Kahle, M.; Buerge, I. J.; Hauser, A.; Müller, M. D.; Poiger, T., Azole fungicides: occurrence and fate in wastewater and surface waters. *Environ. Sci. Technol.* **2008**, *42*, (19), 7193-7200.
74. Ebise, S.; Inoue, T., Runoff characteristics of pesticides from paddy fields and reduction of risk to the aquatic environment. *Water Sci. Technol.* **2002**, *45*, (9), 127-131.
75. Fushiwaki, Y.; Tase, N.; Kotoda, K.; Urano, K., Behaviour of fungicide pentachloronitrobenzene and intermediates in an intensive farming area in Japan. *Japanese Journal of Toxicology and Environmental Health* **1994**, *40*, (1), 39-48.
76. Schäfer, R. B.; Caquet, T.; Siimes, K.; Mueller, J.; Lagadic, L.; Liess, M., Effects of pesticides on community structure and ecosystem functions in agricultural streams of three biogeographical regions in Europe. *Sci. Total Environ.* **2007**, *382*, 272-285.
77. Padovani, L.; Capri, E.; Padovani, C.; Puglisi, E.; Trevisan, M., Monitoring tricyclazole residues in rice paddy watersheds. *Chemosphere* **2006**, *62*, 303-314.
78. Porsbring, T.; Blanck, H.; Tjellström, H.; Backhaus, T., Toxicity of the pharmaceutical clotrimazole to marine microalgal communities. *Aquat. Toxicol.* **2009**, *91*, (3), 203-211.
79. Richter, E.; Wick, A.; Ternes, T. A.; Coors, A., Ecotoxicity of climbazole, a fungicide contained in antidandruff shampoo. *Environ. Toxicol. Chem.* **2013**, *32*, (12), 2816-25.
80. Gonzalez-Ortegon, E.; Blasco, J.; Le Vay, L.; Gimenez, L., A multiple stressor approach to study the toxicity and sub-lethal effects of pharmaceutical compounds on the larval development of a marine invertebrate. *J. Hazard. Mater.* **2013**, *263*, 233-238.
81. Bernabò, I.; Guardia, A.; Macirella, R.; Sesti, S.; Crescente, A.; Brunelli, E., Effects of long-term exposure to two fungicides, pyrimethanil and tebuconazole, on survival and life history traits of Italian tree frog (*Hyla intermedia*). *Aquat. Toxicol.* **2016**, *172*, 56-66.
82. Dijksterhuis, J.; van Doorn, T.; Samson, R.; Postma, J., Effects of seven fungicides on non-target aquatic fungi. *Water, Air, Soil Pollut.* **2011**, *222*, (1), 421-425.
83. van Wijngaarden, R. P.; Belgers, J. D.; Zafar, M. I.; Matser, A. M.; Boerwinkel, M. C.; Arts, G. H., Chronic aquatic effect assessment for the fungicide azoxystrobin. *Environ. Toxicol. Chem.* **2014**, *33*, 2775-2785.
84. Warming, T. P.; Mulderij, G.; Christoffersen, K. S., Clonal variation in physiological responses of *Daphnia magna* to the strobilurin fungicide azoxystrobin. *Environ. Toxicol. Chem.* **2009**, *28*, (2), 374-380.
85. Hooser, E. A.; Belden, J. B.; Smith, L. M.; McMurry, S. T., Acute toxicity of three strobilurin fungicide formulations and their active ingredients to tadpoles. *Ecotoxicology* **2012**, *21*, (5), 1458-1464.
86. Zubrod, J. P.; Englert, D.; Feckler, A.; Koksharova, N.; Kenschak, M.; Bundschuh, R.; Schnetzer, N.; Englert, K.; Schulz, R.; Bundschuh, M., Does the current fungicide risk assessment provide sufficient protection for key drivers in aquatic ecosystem functioning? *Environ. Sci. Technol.* **2015**, *49*, 1173–1181.
87. Silva, A. R. R.; Cardoso, D. N.; Cruz, A.; Lourenço, J.; Mendo, S.; Soares, A. M. V. M.; Loureiro, S., Ecotoxicity and genotoxicity of a binary combination of triclosan and carbendazim to *Daphnia magna*. *Ecotoxicol. Environ. Saf.* **2015**, *115*, 279-290.
88. Rico, A.; Waichman, A. V.; Geber-Correa, R.; van den Brink, P. J., Effects of malathion and carbendazim on Amazonian freshwater organisms: comparison of tropical and temperate species sensitivity distributions. *Ecotoxicology* **2011**, *20*, (4), 625-634.
89. McMahon, T. A.; Romansic, J. M.; Rohr, J. R., Nonmonotonic and monotonic effects of pesticides on the pathogenic fungus *Batrachochytrium dendrobatidis* in culture and on tadpoles. *Environ. Sci. Technol.* **2013**, *47*, (14), 7958-7964.
90. Belgers, J.; Aalderink, G.; Van den Brink, P., Effects of four fungicides on nine non-target submersed macrophytes. *Ecotoxicol. Environ. Saf.* **2009**, *72*, (2), 579-584.
91. Bellas, J., Comparative toxicity of alternative antifouling biocides on embryos and larvae of marine invertebrates. *Sci. Total Environ.* **2006**, *367*, (2), 573-585.
92. McMahon, T. A.; Halstead, N. T.; Johnson, S.; Raffel, T. R.; Romansic, J. M.; Crumrine, P. W.; Boughton, R. K.; Martin, L. B.; Rohr, J. R., The fungicide chlorothalonil is nonlinearly associated with corticosterone levels, immunity, and mortality in amphibians. *Environ. Health Perspect.* **2011**, *119*, (8), 1098.
93. Rohr, J. R.; Brown, J.; Battaglin, W. A.; McMahon, T. A.; Relyea, R. A., A pesticide paradox: Fungicides indirectly increase fungal infections. *Ecol. Appl.* **2017**, *27*, 2290-2302.

94. Mo, H. H.; Kim, Y.; Lee, Y. S.; Bae, Y. J.; Khim, J. S.; Cho, K., Burrowing mayfly *Ephemera orientalis* (Ephemeroptera: Ephemeridae) as a new test species for pesticide toxicity. *Environmental Science and Pollution Research* **2016**, *23*, (18), 18766-18776.
95. Gürkan, M.; Hayretdağ, S., Acute toxicity of maneb in the tadpoles of common and green toad. *Archives of Industrial Hygiene and Toxicology* **2015**, *66*, (3), 189-195.
